# Supplementary material for: Measuring Decadal Vertical Land-level Changes from SRTM-C (2000) and TanDEM-X (~ 2015) in the South-Central Andes
Source: Copernicus journal article supplement (doi:10.5194/esurf-2018-51), 2018-07-06
Supplement: Supplementary file 1 [file esurf-2018-51-supplement.zip]

Archive with 2 entries (2 files):
- BP_dh_esurf_supp_v1.pdf
- Iterative-Shifting-Video.mp4
